# Supplementary material for: Fabrication of chiral silver nanoparticles and chiral nanoparticulate film via organogel
Source: Royal Society of Chemistry journal article supplement (doi:10.1039/b812567h), 2008-01-01
Supplement: b812567h.pdf [file b812567h.pdf]

## Electronic Supplementary Information

*for*

### **Fabrication of chiral silver nanoparticles and chiral nanoparticulated film via organogel**

**Yuangang Li and Minghua Liu\***

**by**

*Beijing National Laboratory for Molecular Science (BNLMS), CAS Key Laboratory of Colloid, Interface and Chemical Thermodynamics, Institute of Chemistry, The Chinese Academy of Sciences, Beijing, 100190, People's Republic of China.  
Tel:86-10-82612655; E-mail: [liumh@iccas.ac.cn](mailto:liumh@iccas.ac.cn) (M. Liu)*

#### **Synthesis of the gelators**

Synthesis and characterization of N, N'-bis(octadecyl)-L-Boc-glutamic-diamide (LBG2C18) were reported previously by our group<sup>1</sup>. The Boc group was made to free amino by mixing with trifluoroacetic acid in dichloromethane and separated. This compound was further reacted with maleic anhydride to give M-LG2C18. Then M-LG2C18 was transferred to the silver salt by reacting with Ag<sub>2</sub>O. The characterization data for Ag-M-LG2C18 was as follows. <sup>1</sup>H-NMR (DMSO-d<sub>6</sub>, 300Hz) δ (ppm): 0.84-0.86 (t, 6H, J = 6.0Hz, CH<sub>3</sub>); 1.26 (br, 60, CH<sub>2</sub>), 1.40-1.45 (m, 4H, CH<sub>2</sub>); 1.79-1.96 (m, 2H, CH<sub>2</sub>); 2.10-2.15 (m, 2H, CH<sub>2</sub>); 2.99-3.07 (m, 4H, CH<sub>2</sub>), 4.17-4.19 (m, 1H, CH); 5.68-5.72 (d, 1H, J = 12.0Hz, CH); 6.12-6.16 (d, 1H, J = 12.0Hz, CH); 7.34 (br, 1H, NH); 7.43 (br, 1H, NH); 10.71(br, 1H, NH). El. Anal. Calcd for C<sub>45</sub>H<sub>84</sub>AgN<sub>3</sub>O<sub>5</sub>·H<sub>2</sub>O C: 61.91, H: 9.93, N: 4.81; found C: 61.97, H: 9.90, N: 4.87.

**Gelation property of the gelators:**

| solvents | M-LG2C18        | Ag-M-LG2C18     |
|----------|-----------------|-----------------|
| methanol | White Gel       | White Gel       |
| ethanol  | White Gel       | White Gel       |
| DMSO     | Transparent Gel | Transparent Gel |
| toluene  | Transparent Gel | Transparent Gel |

**Preparation of silver nanoparticles**

5 mg Ag-M-LG2C18 were dissolved in 1 mL ethanol under heating. After cooled to room temperature white gel formed. The formed gel was dispersed in 20 mL ethanol under vigorous stirring at room temperature and 6.5 mg hydroquinone was added to the mixture. Then the mixture was stirred for 3 hours in dark and yellow silver colloid was obtained.

**Preparation of silver nanoparticles embedded thin films**

2.5 mg Ag-M-LG2C18 and 5 mg PMMA ( $M_w = 15,000$ ) was dissolved in toluene under heating and the hot solution was cast on quartz slide and transparent gel layer formed. After evaporation of toluene in vacuum, a uniform transparent film was obtained. Then the film was placed nearby 50 mL 40%  $H_2NNH_2$  aqueous solution in a sealed box for 24 hours and yellow film was obtained for measurements.

**Measurement**

FESEM was performed using a Hitachi S-4300 system and TEM images were obtained on a JEM-1011 electron microscope operating at accelerating voltages of 15

kV and 100 kV, respectively.

FT-IR spectra were obtained by a JASCO FT/IR-660 plus spectrophotometer. CD and UV-vis spectra were obtained by a JASCO J-815 CD and a JASCO UV-550 spectrophotometer, respectively. The spectra of silver colloid were measured using 10 mm quartz cell. The spectra of silver nanoparticles embedded film were measured using quartz slide. In the CD measurement of film, the quartz slide was placed perpendicular to the light path and rotated within the film plane to avoid polarization-dependent reflections and eliminate the possible angle dependence of the CD signals. All AFM pictures were measured with a Digital Instrument Nanoscope III Multimode system (Santa, Barbara, CA) with a silicon cantilever using the tapping mode. All the AFM images are shown in the height mode without any image processing except flattening.

Reference:

1. Y. G. Li, T. Y. Wang and M. H. Liu, *Soft Matter*, 2007, **3**, 1312-1317.
